# Supplementary material for: Mapping Lymph Node during Indocyanine Green Fluorescence-Imaging Guided Gastric Oncologic Surgery: Current Applications and Future Directions
Source: MDPI journal article supplement (doi:10.3390/cancers14205143), 2022-10-20
Supplement: s1 [file s1]

**Table S1.** Detailed implementation of SLN detection studies.

| Ref                            | No. of Patients | Submucosal/<br>Subserosal | ICG<br>Dosage<br>(mg) | Waiting<br>Time | Lymph<br>Node<br>(mean) | SLN<br>(mean) | Near-Infrared System                                                             |
|--------------------------------|-----------------|---------------------------|-----------------------|-----------------|-------------------------|---------------|----------------------------------------------------------------------------------|
| Hiratsuka, M.<br>2001 [26]     | 74              | subserosal                | 25                    | 5 min           | 39                      | 2.3           | NA                                                                               |
| Nimura, H.<br>2004 [36]        | 84              | submucosal                | 2.5                   | 20 min          | NA                      | 10.5          | IREE (Olympus Optical,<br>Tokyo, Japan)                                          |
| Park, D. J.<br>2006 [25]       | 100             | subserosal                | 25                    | 5 min           | 37.3                    | 4.4           | NA                                                                               |
| Kusano, M.<br>2008 [27]        | 22              | subserosal                | NA                    | NA              | 33.9                    | 3.6           | Infrared Camera System<br>PDE (Hamamatsu<br>Photonics, Hamamatsu,<br>Japan)      |
| Kelder, W.<br>2010 [28]        | 212             | submucosal                | 2.5                   | 20 min          | NA                      | 6             | infrared ray electronic<br>endoscopy (IREE,<br>Olympus Optical,<br>Tokyo, Japan) |
| Park, D. J.<br>2011 [29]       | 68              | submucosal                | NA                    | 15 min          | NA                      | 2.5           | NA                                                                               |
| Miyashiro, I.<br>2013 [30]     | 241             | submucosal/<br>subserosal | 20–25                 | 5 min           | 40                      | 3.8           | NA                                                                               |
| Miyashiro, I.<br>2014 [38]     | 440             | subserosal                | 25                    | NA              | NA                      | 4<br>(medium) | NA                                                                               |
| Tummers, Q.<br>R.<br>2016 [40] | 22              | subserosal                | 25                    | NA              | 24                      | 4.4           | Mini-FLARETM<br>NIR fluorescence<br>imaging system                               |
| Takahashi, N.<br>2017 [41]     | 44              | submucosal                | 10                    | 20 min          | NA                      | 4.1           | IRLS (Olympus Optical,<br>Tokyo, Japan) (infrared<br>light observation)          |
| Mayanagi, S.<br>2020 [42]      | 132             | submucosal                | NA                    | 10-15<br>min    | NA                      | 5             | NA                                                                               |
